# Supplementary material
Source: PubMed Central journal article supplement (PMC3320244)

**Supplemental Figure 1.** Changes in total relative *Rfrp* mRNA levels in the DMN of male and female mice over postnatal development (determined by the total number of silver grains in DMN). Bars labeled with different letters differ significantly from each other ( $p < 0.05$ ).

**Supplemental Figure 2.** Changes in total relative *Rfrp* mRNA levels in the DMN of adult mice treated with different sex steroid treatments (determined by the total number of silver grains in DMN). Bars labeled with different letters differ significantly from each other ( $p < 0.05$ ).

# Supplemental Figure 1

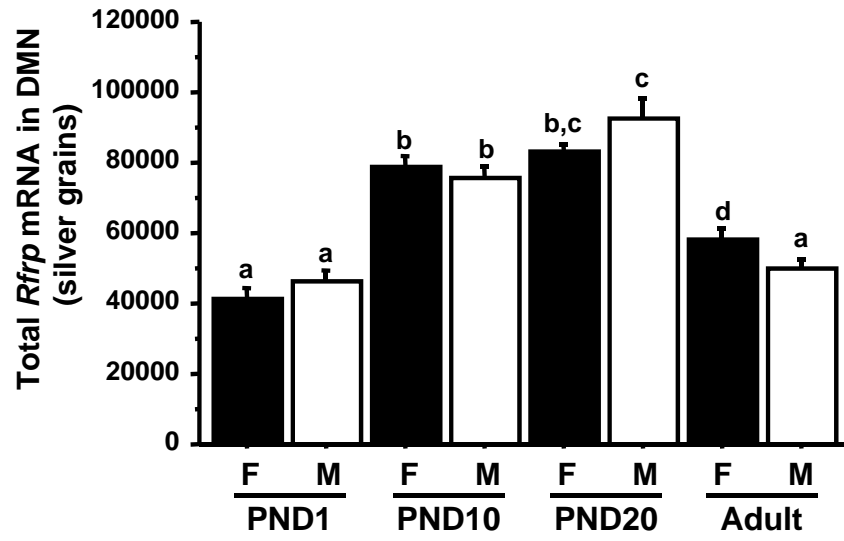

## Supplemental Figure 2

A)

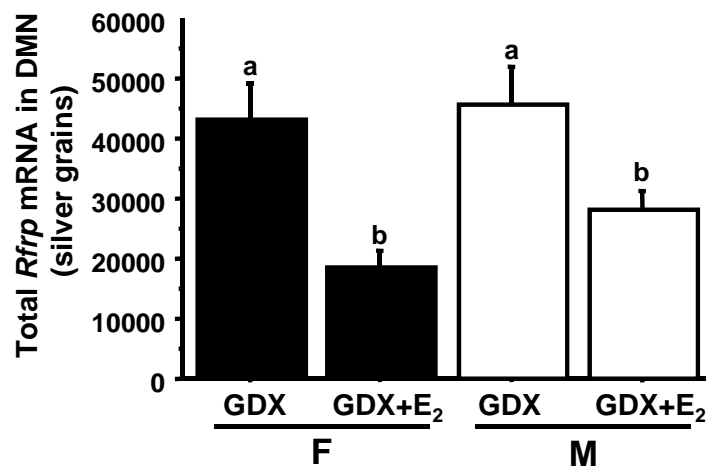

B)

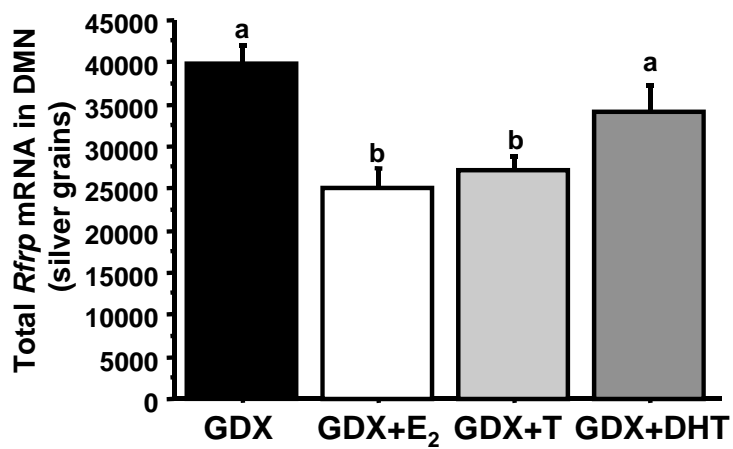

Supplement: supp_en.2011-2049_en-11-2049_figs_1-2.pdf [file supp_en.2011-2049_en-11-2049_figs_1-2.pdf]
